# Supplementary material for: Spatial transcriptomics reveals niche-specific enrichment and vulnerabilities of radial glial stem-like cells in malignant gliomas
Source: PubMed Central journal article supplement (PMC9950149; doi:10.1038/s41467-023-36707-6), 2023-02-23
Supplement: 41467_2023_36707_MOESM3_ESM.pdf [file 41467_2023_36707_MOESM3_ESM.pdf]

### **Description of Additional Supplementary Files**

File Name: Supplementary Data 1

Description: Patient sample information.

File Name: Supplementary Data 2

Description: Quality control for short- and long-read transcriptomes.

File Name: Supplementary Data 3

Description: Four integrated gene sets of spatial transcriptional modules.

File Name: Supplementary Data 4

Description: Gene Ontology enrichment analysis of Biological Process (BP) for all glioma modules.

File Name: Supplementary Data 5

Description: Niche-specific differentially expressed isoforms across all samples.

File Name: Supplementary Data 6

Description: Survival-related splice junctions from differentially expressed isoforms.

File Name: Supplementary Data 7

Description: A list of RG-Vs-AC-specific genes based on Bhaduri et al. GBM scRNA-seq.

File Name: Supplementary Data 8

Description: Predicted ligand-receptor pairs in each module.

File Name: Supplementary Data 9

Description: Gene expression dynamics along the spatial tumor invasion trajectory.

File Name: Supplementary Data 10

Description: Gene Ontology enrichment analysis of BP for genes in the GCL\_TI\_RG signature.
